# Supplementary material for: In the Short Term We Divide, in the Long Term We Unite: Demographic Crisscrossing and the Effects of Faultlines on Subgroup Polarization
Source: Atypon-hosted journal article supplement (doi:10.1287/orsc.1120.0767), 2012-09-11
Supplement: orsc.1120.0767-sm-onlineappendix.xlsx [file orsc.1120.0767-sm-onlineappendix.xlsx]

## Sheet: AT1
Appendix Table 1 Cultural Orientation by Country
Country	Egalitarianism	Harmony	Embeddedness
Argentina	5.098	4.26609	3.62517
Australia	4.921	4.12857	3.84725
Austria	5.059	4.62159	3.18628
Bolivia	4.834	4.26001	4.2143
Brazil	5.037	4.04006	3.79994
Bulgaria	4.249	4.25104	4.02569
Canada	4.985	4.19854	3.52147
Chile	5.109	4.49337	3.90237
China	4.312	3.76161	3.73831
Cyprus	5.061	4.3231	4.19374
Czech Republic	4.589	4.66122	3.76797
Denmark	5.147	4.32027	3.28888
Egypt	4.827	4.20017	4.69191
Estonia	4.752	4.66318	4.07832
Finland	5.026	4.58601	3.53193
France	5.183	4.49521	3.09743
Georgia	4.742	4.09416	4.24505
Germany	5.14	4.70599	3.18272
Ghana	4.854	3.43295	4.29991
Greece	4.979	4.68334	3.46888
Hong Kong	4.612	3.61146	3.87208
Hungary	4.507	4.38407	3.72656
India	4.494	3.97869	3.91274
Indonesia	4.325	3.99212	4.50258
Ireland	4.987	3.89676	3.59756
Israel	4.857	3.35174	3.82317
Italy	5.376	4.90461	3.61122
Japan	4.466	4.30177	3.54667
Jordan	4.47	3.70391	4.35375
Macedonia	4.475	4.14044	4.04758
Malaysia	4.497	3.68111	4.33204
Mexico	4.774	4.5761	3.79188
Namibia	4.599	3.56069	4.01998
Nepal	4.703	4.1558	4.27618
Netherlands	5.083	4.19199	3.35495
New Zealand	5.027	4.19316	3.47098
Norway	5.285	4.63513	3.54981
Peru	4.984	3.91345	4.14067
Philippines	4.603	4.08435	4.07079
Poland	4.546	4.23512	4.05061
Portugal	5.388	4.56953	3.51281
Russia	4.641	4.25373	4.04339
Singapore	4.691	3.97919	4.21284
Slovakia	4.578	4.52631	4.04859
Slovenia	4.581	4.77396	3.8161
South Korea	4.471	3.56223	3.78411
Spain	5.203	4.63634	3.36287
Sweden	4.96	4.54005	3.23419
Switzerland	4.979	4.52613	3.0427
Taiwan	4.394	4.22447	4.04806
Turkey	4.909	4.30906	4.02597
United Kingdom	4.998	3.81401	3.55212
United States	4.799	3.69422	3.77094
Venezuela	4.734	4.02563	3.94262
Zimbabwe	4.311	3.57334	4.06791
Notes. This table presents the cultural orientation scores for each country. The data are from the Year 2005
release of the Schwartz data set and are based on teacher surveys collected during 1988–2004.
When using the data in this appendix table, we ask that one refer to the Year 2005 release of the
Schwartz data set and cite this paper as the source.

## Sheet: AT2
Appendix Table 2 Robustness Checks with Time Period and Use of Tobit
Independent variable	(1) Year 1995 only		(2) Years 1990–2000 only		(3) Years 1990–2004 only			(4) Alternative Tobit specification		(5) Alternative Tobit specification for Years 1990–2004 only
Predicted egalitarianism distance	-1.198	***	-1.134	***	-1.138	***		-1.3685	***	-1.761	***
	[0.339]		[0.230]		[0.209]			[0.392]		[0.382]
Harmony distance	0.1796		0.1245		0.1337			-0.1748		-0.0746
	[0.130]		[0.089]		[0.084]			[0.148]		[0.157]
Embeddedness distance	-0.419	***	-0.412	***	-0.4406	***		0.5096	***	0.4148	**
	[0.149]		[0.088]		[0.081]			[0.179]		[0.185]
Log product of origin-host GDP	0.2059	***	-1.0115	***	-1.0426	***		-1.1085	***	-1.848	***
	[0.060]		[0.318]		[0.228]			[0.421]		[0.574]
Log product of origin-host GDP per capita	0.317	***	1.6418	***	1.5919	***		3.344	***	3.655	***
	[0.092]		[0.326]		[0.220]			[0.422]		[0.595]
Signed corporate taxation distance	0.003		0.001		0.003	**		-0.0045		-0.0019
	[0.013]		[0.002]		[0.002]			[0.003]		[0.004]
PolconIII distance	-0.788		-0.385		-0.161			-1.4065	**	-2.1819	***
	[0.689]		[0.345]		[0.306]			[0.565]		[0.661]
Common language	0.0669		0.343	**	0.3517	**		0.9277	***	0.979	***
	[0.188]		[0.144]		[0.139]			[0.240]		[0.258]
Common colonizer	0.182		0.1077		0.096			0.4889	**	0.53	**
	[0.154]		[0.116]		[0.108]			[0.231]		[0.245]
Geographic distance	-0.673	***	-0.653	***	-0.6625	***		-1.3825	***	-1.446	***
	[0.064]		[0.044]		[0.041]			[0.065]		[0.067]
Different legal family	-0.185	**	-0.1699	***	-0.1418	***		-0.3066	***	-0.2386	**
	[0.090]		[0.062]		[0.055]			[0.104]		[0.110]
Rule of law distance	-0.0279		-0.033	***	-0.035	***		-0.099	***	-0.0966	***
	[0.020]		[0.013]		[0.012]			[0.025]		[0.026]
Obs	1955		20600		30330			39998		30330
P-value	0.000		0.000		0.000			0.000		0.000
R-squared	0.5991		0.5616		0.5395			0.2446		0.2375
Notes.This table presents the results of alternative OLS models focused on specific time periods and then using a tobit specification.
Robust standard errors corrected for clustering at the origin-host country pair level appear below the coefficients in brackets.
All models in this table include fixed effects for origin countries and host countries as well as year dummies.
*** means significance at the .01 level, ** means significance at the .05 level, and * means significance at the .10 level.
For tobit specifications, the R-squared is termed pseudo R-squared.

## Sheet: AT3
Appendix Table 3 Robustness Checks Using QAP and Cochrane-Orcutt
Independent variable	(1) Robustness check: Using Cochrane-Orcutt correction for AR(1)			(2) Robustness check: Using Cochrane-Orcutt correction for AR(1)			(3) Robustness check: Using Cochrane-Orcutt correction for AR(1)
Egalitarianism distance	-0.566384	***		-0.890909	***
	[0.125]			[0.255]
Signed egalitarianism distance	0.201029	**		0.043678
	[0.084]			[0.143]
Predicted egalitarianism distance							-1.471	***
							[0.506]
Predicted signed egalitarianism distance							0.345
							[0.228]
Harmony distance	0.154356	**		0.42356	**		0.4076	**
	[0.075]			[0.199]			[0.199]
Signed harmony distance	-0.44876	***		-0.59551	***		-0.5535	***
	[0.062]			[0.112]			[0.113]
Embeddedness distance	-0.0167132			0.965651	***		1.0705	***
	[0.066]			[0.213]			[0.218]
Signed embeddedness distance	-0.788261	***		-1.22828	***		-1.0969	***
	[0.058]			[0.125]			[0.154]
Log product of origin-host GDP	0.421762	***		0.606657	***		0.605	***
	[0.016]			[0.032]			[0.032]
Log product of origin-host GDP per capita	0.1619	***		0.120189	*		0.1305	*
	[0.018]			[0.068]			[0.069]
Signed corporate taxation distance	0.0018707			-0.0065406	**		-0.0069	**
	[0.001]			[0.003]			[0.003]
PolconIII distance	0.175004			-0.054151			-0.0126
	[0.147]			[0.687]			[0.687]
Common language	0.294868	**		0.848274	***		0.9039	***
	[0.151]			[0.329]			[0.326]
Common colonizer	0.301188	**		0.557427	**		0.5575	**
	[0.119]			[0.268]			[0.264]
Geographic distance	-0.598164	***		-0.758	***		-0.7745	***
	[0.032]			[0.042]			[0.044]
Different legal family	-0.148918	**		-0.143385			-0.119
	[0.064]			[0.137]			[0.139]
Rule of law distance	-0.0199547	*		-0.127859	**		-0.1256	**
	[0.012]			[0.051]			[0.051]
Visser government intervention distance				-0.0299296	***		-0.0298	***
				[0.007]			[0.007]
Obs	39493			12313			12313
P-value	0.000			0.000			0.000
R-squared	0.1251			0.1907			0.1906
Notes. This table presents the results of OLS regressions in which the log of (FDI Flow + 1) serves as the dependent
variable. Robust standard errors corrected for clustering at the origin-host country pair level appear below the coefficients in brackets.
*** means significance at the .01 level, ** means significance at the .05 level, and * means significance at the .10 level.

## Sheet: AT4
Appendix Table 4 Robustness Check with OECD Data
Independent variable	(1)			(2) Robustness check: Introducing fixed effects for origin countries and host countries as well as year dummies			(3) Robustness check: Introducing fixed effects for origin countries and host countries as well as year dummies			(4) Robustness check: Introducing fixed effects for origin countries and host countries as well as year dummies
Egalitarianism distance	-0.45034	***		-0.393184	***
	[0.123]			[0.146]
Signed egalitarianism distance	0.188745	**
	[0.088]
Predicted egalitarianism distance							-3.365	***		-1.3776	***
							[1.142]			[0.240]
Signed predicted egalitarianism distance
Harmony distance	0.152023	*		0.181618	**		-0.2738			0.18	**
	[0.078]			[0.091]			[0.247]			[0.092]
Signed harmony distance	-0.395331	***
	[0.065]
Embeddedness distance	0.119539	*		-0.213575	**		0.5648	*		-0.025
	[0.068]			[0.097]			[0.301]			[0.102]
Signed embeddedness distance	-0.707446	***
	[0.061]
Log product of origin-host GDP	0.472925	***		-1.53553	***		1.078			-1.4659	***
	[0.017]			[0.241]			[1.017]			[0.247]
Log product of origin-host GDP per capita	0.238117	***		2.31698	***		0.847			2.242	***
	[0.020]			[0.236]			[1.052]			[0.242]
Signed corporate taxation distance	-4.86E-05			0.0076458	***		0.0188	***		0.0077	***
	[0.002]			[0.002]			[0.004]			[0.002]
PolconIII distance	0.718258	**		0.452718	*		-2.9257	*		0.076
	[0.311]			[0.241]			[1.676]			[0.269]
Common language	0.474993	***		0.292697	**		-0.749	*		0.279	*
	[0.168]			[0.140]			[0.391]			[0.143]
Common colonizer	0.369112	**		0.209592	*		0.927	***		0.2506	**
	[0.144]			[0.118]			[0.317]			[0.119]
Geographic distance	-0.579428	***		-0.687792	***		-0.8276	***		-0.677	***
	[0.031]			[0.043]			[0.110]			[0.045]
Different legal family	-0.119643	*		-0.130751	**		-0.553	***		-0.1127	*
	[0.072]			[0.057]			[0.146]			[0.059]
Rule of law distance	-0.0432394	***		-0.0836825	***		0.001			-0.08	***
	[0.012]			[0.016]			[0.086]			[0.016]
Visser government intervention distance							-0.011
							[0.014]
Wei-Shleifer net FDI incentives distance							-0.0298
							[0.021]
Rodden Federalism Distance							-2.955e-04
							[1.243e-04]
Polity distance										0.001	***
										[3.103e-04]
Obs	31543			31543			6158			30001
P-value	0.000			0.000			0.000			0.000
R-squared	0.4188			0.5493			0.5158			0.5545
Notes. This table presents the results of OLS regressions in which the log of (FDI Flow + 1)
serves as the dependent variable. For this robustness check, our dependent variable is
constructed as before but comes from an alternative FDI database published by the OECD.
Robust standard errors corrected for clustering at the origin-host country pair level appear
below the coefficients in brackets.
*** means significance at the .01 level, ** means significance at the .05 level, and * means significance at the .10 level.

## Sheet: AT5
Appendix Table 5 Robustness Check with Hofstede Dimensions
Independent variable	(1)			(2) Robustness check: Introducing fixed effects for origin countries and host countries as well as year dummies			(3)			(4) Robustness check: Introducing fixed effects for origin countries and host countries as well as year dummies
Power distance	4.3e-05			5.29E-05	***		-3.46E-05			2.33E-05
	[2.39E-05]			[2.63E-05]			[5.6E-05]			[4.53E-05]
Signed power distance	-0.0047224	***					-0.0069762	***
	[0.001]						[0.002]
Uncertainty avoidance distance	-2.71E-06			3.4E-05	*		-1.85E-05			-9.53e-06
	[1.94E-05]			[1.92E-05]			[2.82E-05]			[2.72E-05]
Signed uncertainty avoidance distance	-0.0026702	***					-0.0024845	*
	[0.001]						[0.001]
Individualism distance	4.8E-05			-1.288E-04	***		4.35E-05			-1.273E-04	***
	[2.94E-05]			[2.47E-05]			[4.54E-05]			[4.05E-05]
Signed Individualism distance	0.0080659	***					0.0075752	***
	[0.001]						[0.002]
Masculinity distance	-1.348E-04	***		-1.011E-04	***		-1.747E-04			-1.279E-04	***
	[3.1E-05]			[2.66E-05]			[3.53E-05]			[2.91E-05]
Signed masculinity distance	0.0040944	***					0.0028278	*
	[0.001]						[0.001]
Long-term Orientation distance							-2.16E-04	***		-4.44E-06
							[5.15E-05]			[4.61E-05]
Signed Long-term Orientation distance							0.00697	***
							[0.002]
Log product of origin-host GDP	0.575414	***		-2.36249	***		0.650611	***		-2.53361	***
	[0.024]			[0.250]			[0.029]			[0.395]
Log product of origin-host GDP per capita	0.270664	***		3.22666	***		0.411256	***		3.40643	***
	[0.024]			[0.256]			[0.038]			[0.456]
Signed corporate taxation distance	-0.006286	***		0.0041397	*		-0.0056309			0.0077434	**
	[0.002]			[0.002]			[0.004]			[0.003]
PolconIII distance	1.30929	***		1.11558	***		2.25834	***		1.48534	**
	[0.332]			[0.281]			[0.554]			[0.587]
Common language	0.0997272			0.0424654			0.682293	***		0.101915
	[0.152]			[0.116]			[0.216]			[0.168]
Common colonizer	0.605703	***		0.274288	**		-0.0666752			-0.0381341
	[0.155]			[0.118]			[0.258]			[0.201]
Geographic distance	-0.651254	***		-0.624263	***		-0.691843	***		-0.711198	***
	[0.042]			[0.041]			[0.053]			[0.054]
Different legal family	-0.186147	*		-0.292305	***		-0.4646	***		-0.472944	***
	[0.098]			[0.078]			[0.173]			[0.115]
Rule of law distance	-0.0145925			0.0075236			0.0776262	*		-0.0108787
	[0.017]			[0.016]			[0.043]			[0.033]
Obs	25054			25054			13517			13517
P-value	0.000			0.000			0.000			0.000
R-squared	0.4146			0.5548			0.4257			0.5472
Notes. This table presents the results of OLS regressions in which the log of (FDI Flow + 1) serves
as the dependent variable. Instead of using the Schwartz dimensions, we use the cultural dimensions
from Hofstede. In order to have an apples-to-apples comparison, the country sample and other variables
are the same as in our main analysis. Robust standard errors corrected for clustering at the origin-host
country pair level appear below the coefficients in brackets.
*** means significance at the .01 level, ** means significance at the .05 level, and * means significance at the .10 level.

## Sheet: AT6
Appendix Table 6. Robustness Check with Globe Dimensions
Independent variable	(1)			(2) Robustness check: Introducing fixed effects for origin countries and host countries as well as year dummies
GLOBE Assertiveness distance	-0.0813523	***		-0.0284895
	[0.022]			[0.023]
Signed GLOBE Assertiveness distance	0.110324	***
	[0.032]
GLOBE Future Orientation distance	0.0327108			-0.0426897
	[0.060]			[0.070]
Signed GLOBE Future Orientation distance	0.252246	***
	[0.079]
GLOBE Gender Egalitarianism distance	-0.128918	***		-0.0956271	*
	[0.048]			[0.055]
Signed GLOBE Gender Egalitarianism distance	0.0230652
	[0.072]
GLOBE Humane Orientation distance	0.0184514			0.0409579
	[0.121]			[0.169]
Signed GLOBE Human Orientation distance	-0.0512498
	[0.103]
GLOBE Group Collectivism distance	0.0600074			-0.0667755
	[0.104]			[0.093]
Signed GLOBE Group Collectivism distance	-0.217738	**
	[0.089]
GLOBE Institutional Collectivism distance	-0.333483	***		-0.0588829
	[0.058]			[0.054]
Signed GLOBE Institutional Collectivism distance	-0.1001
	[0.062]
GLOBE Performance Orientation distance	-0.117596			-1.32E-05
	[0.112]			[0.111]
Signed GLOBE Performance Orientation distance	-0.17067	**
	[0.082]
GLOBE Power Distance distance	0.196378	*		-0.182443	*
	[0.109]			[0.107]
Signed GLOBE Power Distance distance	-0.175276	*
	[0.097]
GLOBE Uncertainty Avoidance distance	0.010065			-0.0724916	*
	[0.041]			[0.042]
Signed GLOBE Uncertainty Avoidance distance	-0.607059	***
	[0.055]
Log product of origin-host GDP	0.481397	***		-2.25784	***
	[0.020]			[0.218]
Log product of origin-host GDP per capita	0.178856	***		3.11965	***
	[0.021]			[0.218]
Signed corporate taxation distance	0.0035311	*		0.0023073
	[0.002]			[0.002]
PolconIII distance	0.219931			0.0796168
	[0.285]			[0.329]
Common language	0.0864082			0.242382	*
	[0.156]			[0.128]
Common colonizer	0.532434	***		0.189343	*
	[0.141]			[0.114]
Geographic distance	-0.568657	***		-0.622962	***
	[0.039]			[0.046]
Different legal family	-0.0153618			-0.0965256
	[0.075]			[0.064]
Rule of law distance	0.0095868			-0.0208164
	[0.015]			[0.015]
Obs	30137			30137
P-value	0.000			0.000
R-squared	0.4183			0.5551
Notes. This table presents the results of OLS regressions in which the log of (FDI Flow + 1) serves
as the dependent variable. Instead of using the Schwartz dimensions, we use the GLOBE cultural
dimensions. In order to have an apples-to-apples comparison, the country sample and other variables
are the same as in our main analysis. Robust standard errors corrected for clustering at the origin-host
country pair level appear below the coefficients in brackets.
*** means significance at the .01 level, ** means significance at the .05 level, and * means significance at the .10 level.

## Sheet: AT7
Appendix Table 7 Egalitarianism and Non-M&A FDI Flows
Independent variable	(1) Robustness check with alternative dependent variable: Non-M&A FDI flows (equal to log of (non-M&A FDI flow + 1); Standardizing all variables, and adding embeddedness mechanisms
Egalitarianism distance	-0.0969	***
	[0.026]
Signed egalitarianism distance	-0.07	*
	[0.038]
Harmony distance	0.0488
	[0.031]
Signed harmony distance	-0.1646	***
	[0.034]
Embeddedness distance	-0.008
	[0.024]
Signed embeddedness distance	-0.1478	***
	[0.042]
Log product of origin-host GDP	1.107	***
	[0.045]
Log product of origin-host GDP per capita	0.316	***
	[0.040]
Signed corporate taxation distance	0.0147
	[0.024]
PolconIII distance	0.0569	**
	[0.025]
Common language	0.007
	[0.035]
Common colonizer	0.122	***
	[0.036]
Geographic distance	-0.499	***
	[0.031]
Different legal family	-0.087	***
	[0.030]
Rule of law distance	0.0979	***
	[0.037]
Bilateral investment treaty in effect	-0.001
	[0.019]
Bilateral tax treaty in effect	0.06	**
	[0.024]
Log GDP per capita distance	-0.076	*
	[0.043]
Signed log GDP per capita distance	0.2119	***
	[0.061]
Environmental Regulation Index distance	-0.1086	***
	[0.037]
Signed Environmental Regulation Index distance	0.2426	***
	[0.040]
Obs	30934
P-value	0.000
R-squared	0.3947
Notes. This table presents the results of OLS regressions in which the log of (non-M&A FDI Flow + 1) serves as the dependent variable. Robust standard errors corrected for clustering at the origin-host country pair level appear below the coefficients in brackets.
*** means significance at the .01 level, ** means significance at the .05 level, and * means significance at the .10 level.
